# Supplementary material for: Analysis of copy number variation in men with non-obstructive azoospermia
Source: PubMed Central journal article supplement — Andrology. Author manuscript; Available in PMC 2023 Nov 1. (PMC9605881; doi:10.1111/andr.13267), 2022-09-23
Supplement: NIHMS1833267-supplement-supinfo1.pdf [file NIHMS1833267-supplement-supinfo1.pdf]

## **Supplemental Data**

### **Analysis of copy number variation in men with non-obstructive azoospermia**

M. J. Wyrwoll<sup>1#</sup>, R. Wabschke<sup>1#</sup>, A. Röpke<sup>2</sup>, M. Wöste<sup>3</sup>, C. Ruckert<sup>2</sup>, S. Perrey<sup>4</sup>, N. Rotte<sup>1</sup>, J. Hardy<sup>5</sup>, L. Astica<sup>6</sup>, D. G. Lupiáñez<sup>6</sup>, J. Wistuba<sup>7</sup>, B. Westernströer<sup>7</sup>, S. Schlatt<sup>7</sup>, A. J. Berman<sup>8</sup>, A. M. Müller<sup>9</sup>, S. Kliesch<sup>7</sup>, A. N. Yatsenko<sup>5</sup>, F. Tüttelmann<sup>1</sup>, C. Friedrich<sup>1\*</sup>

## Study cohort

We included data from our previous study<sup>1</sup> that was analysed with the same laboratory workup and a comparable resolution of the arrays.

Control men derived from Tüttelmann *et al.*, 2011<sup>1</sup>:

M370, M385, M419, M420, M422, M424, M443, M447, M449, M484, M485, M492, M494, M495, M590, M599, M622, M670, M671, M672, M676

Men with Sertoli cell-only phenotype derived from Tüttelmann *et al.*, 2011<sup>1</sup>:

M12, M15, M30, M94, M126, M159, M173, M177, M185, M187, M188, M226, M245, M248, M263, M267, M291, M301, M310, M319, M324, M352, M354, M364, M371, M374, M396, M432, M433, M464, M490, M499, M550, M567, M578, M609, M666

## SNP-array

SNP-array was conducted to confirm deletions which were primarily detected via CNV calling from exome sequencing data. The Infinium CytoSNP-850k-Bead Array (Illumina, San Diego, California, USA) with a median probe spacing of 1.8 kb was used. 200 ng of DNA from each proband was amplified and fragmented. Next, DNA fragments were hybridized against oligonucleotides on the BeadChip (Illumina, San Diego, California, USA), distributed over the whole human genome. Subsequently single-base extension was carried out and staining of DNA was performed. All steps were carried out according to the manufacturer's protocol. Scanning of the BeadChips was done with a NextSeq 550 (Illumina, San Diego, California, USA). The BlueFuse Multi software (Illumina, San Diego, California, USA) was used for analyses. Signals larger than 10 adjacent probes were considered to be a genomic CNV.

## Infertility-associated genes (Reviewed in Houston *et al.*, 2021<sup>2</sup>)

*ABCA1, ADCY10, ADGRG2, AK7, AKAP4, ALX4, AMH, AMHR2, ANOS1, APOA1, AR, ARL2BP, ARMC2, AURKC, BCORL1, BMP4, BMP7, BNC2, BRAF, BRDT, BSCL2, C2CD6, C7orf61, CATIP, CATSPER1, CATSPER2, CATSPERE, CCDC103, CCDC141, CCDC39, CCDC40, CCDC62, CCDC9, CCIN, CDC14A, CEP112, CEP135, CEP290, CEP78, CFAP251, CFAP300, CFAP43, CFAP44, CFAP65, CFAP69, CFAP70, CFAP91, CFTR, CHD7, CLDN2, CYP11A1, CYP11B1, CYP17A1, CYP19A1, CYP21A2, DCC, DHH, DHX37, DMC1, DMRT1, DNAAF2, DNAAF4, DNAAF5, DNAAF6, DNAH1, DNAH11, DNAH17, DNAH2, DNAH6, DNAH9, DNAI1, DNAI2, DNAJB13, DNMT1, DPY19L2, DRC1, DUSP6, DZIP1, E2F1, EIF4G1, ERBB4, ESR1, FAM47C, FANCA, FANCM, FBXO43, FEZF1, FGF17, FGF8, FGFR1,*

*FLNA, FSHB, FSHR, FSIP2, GALNTL5, GAS8, GATA4, GFPT2, GGN, GH1, GLI3, GNRH1, GNRHR, H2BW1, HAUS7, HESX1, HOXD13, HS6ST1, HSD17B3, HSD3B2, HSF2, HYDIN, IFT140, IGSF10, IL17RD, INSL3, KASH5, KDM3A, KISS1R, KLHL10, LHB, LHCGR, LHX3, LRRC6, M1AP, MAGEB4, MAMLD1, MAP2K2, MAP3K1, MAP7D3, MC4R, MCM9, MEI1, MEIOB, MLH3, MNS1, MTOR, MYRF, NANOS1, NANOS2, NDNF, NLRP3, NNT, NOS1, NOTCH1, NR0B1, NR5A1, NRAS, NSMF, OFD1, PANK2, PDHA2, PIWIL2, PKD1, PLCZ1, PLK4, PLXNA1, PMFBP1, POU1F1, PPP2R3C, PROK2, PROP1, PSMC3IP, QRICH2, RAF1, RBMXL2, RELN, RNF212, RNF220, RPL10L, RSPH1, RSPH3, RSPH9, RSPO1, RXFP2, SCAPER, SECISBP2, SEMA3A, SEPTIN12, SLC26A3, SOS1, SOX10, SOX2, SOX3, SOX8, SOX9, SPAG17, SPAG6, SPATA16, SPEF2, SPINK2, SPO11, SRA1, SRD5A2, SRY, STAG3, STAR, STK36, STX2, SUN5, SYCE1, SYCP2, SYCP3, TAC3, TACR3, TAF4B, TDRD6, TDRD7, TDRD9, TEX11, TEX14, TEX15, TRIM37, TSGA10, TTC12, TTC21A, TTC29, TTLL5, UBE2B, UBR2, USP26, VAMP7, WDR11, WDR19, WNK3, WT1, XRCC2, ZFX, ZMYND15, ZPBP*

**Table S1: Descriptive statistics of clinical data of all 252 men analysed by aCGH.**

|                                    | <b>All (252)</b>           | <b>MeiA (37)</b>          | <b>SCO (194)</b>           | <b>Controls (21)</b>      |
|------------------------------------|----------------------------|---------------------------|----------------------------|---------------------------|
| <b>Age [y]</b>                     | 33<br>(26 - 43)            | 33<br>(23 - 44)           | 33<br>(26 - 42)            | 35<br>(28 - 49)           |
| <b>Bi-testicular volume [mL]</b>   | 23<br>(9 - 54)             | 18<br>(9 - 53)            | 22<br>(9 - 43)             | 52<br>(23 - 94)           |
| <b>Serum FSH [U/L]</b>             | 19.2<br>(2.6 - 39.7)       | 19.4<br>(2.0 - 36.0)      | 20.6<br>(6.6 - 41.4)       | 3.1<br>(1.4 - 9.3)        |
| <b>Serum LH [U/L]</b>              | 6.4<br>(2.4 - 13.4)        | 7<br>(2.1 - 12.6)         | 6.7<br>(2.6 - 14.2)        | 3.1<br>(1.6 - 5.8)        |
| <b>Serum testosterone [nmol/L]</b> | 13.6<br>(6.3 - 27)         | 13.1<br>(7.7 - 29.9)      | 13.2<br>(5.9 - 27)         | 15.9<br>(8.6 - 37.7)      |
| <b>Origin</b>                      | 198 men of European origin | 29 men of European origin | 152 men of European origin | 20 men of European origin |

Data shown are the median values with the respective 95% confidence intervals.

Abbreviations: y: years, d: days, FSH: follicle stimulating hormone, LH: luteinising hormone, TESE: testicular sperm extraction. Data were not normally distributed and compared between the full cohort and subgroups by Kruskal-Wallis test with Dunn's post-hoc multiple comparison. Grey shaded parameters differed significantly comparing the control group with the other groups. Origin was determined based on self-reporting. All parameters were obtained at their first visit at the Centre of Reproductive Medicine and Andrology.

Reference values: Bi-testicular volume >24 mL, semen volume: 1.5 mL, semen pH: 7.2-8.0, semen fructose >13 µmol/sample, serum FSH 1-7 U/L, serum LH 2-10 U/L, serum testosterone >12 nmol/L.

**Table S2. Primer sequences used for qPCR validation of deletions of interest.**

| <b>Genomic region</b> | <b>Located genes</b>                               | <b>Primer sequence (5' -&gt; 3')</b>                |
|-----------------------|----------------------------------------------------|-----------------------------------------------------|
| 10q26.3               | <i>SYCE1</i> ,<br><i>CYP2E1</i> ,<br><i>SCART1</i> | AGAGACACATGGTGCCATCT<br>CTGGCTGCCTCTCTTCAACA        |
| 10q26.3               | <i>SYCE1</i> ,<br><i>CYP2E1</i> ,<br><i>SCART1</i> | CATGGTGGCGGTAGTTGTCT<br>AGGACAACCCTGAAGCTTCA        |
| 14q24.3               | <i>MLH3</i> ,<br><i>EIF2B2</i>                     | CCCTAGAGAGCCAAGGTCGA<br>TCACTTGGACCGCAATGACA        |
| 14q24.3               | <i>MLH3</i> ,<br><i>EIF2B2</i>                     | TGTAAATCTGCTCCTAAGATTACAACA<br>AGGCATGGCAGACTAGAGTA |
| 16p13.3               | <i>SLX4</i> ,<br><i>CLUAP1</i> ,<br><i>NLRC3</i>   | GCAGTCCAGTTCACCTTGGA<br>CCCAGGTCACCAGAGTTTCC        |
| 16p13.3               | <i>SLX4</i> ,<br><i>CLUAP1</i> ,<br><i>NLRC3</i>   | GGAGGGGAATGGGATGTGAC<br>AGACTTGTCCAACCACCACC        |
| 16p13.13              | <i>TEKT5</i>                                       | TGCCCATGCACTTCTCCTTG<br>TTTGTCACCTGGGCTGGAG         |
| 16p13.13              | <i>TEKT5</i>                                       | CCATGGTAATGAGAACTGCAGTGAAAGCAGGGCTATGTCTGGG         |
| 19p13.3               | <i>CLPP</i>                                        | CCTGAATCTTGGCGAGGGTT<br>CTCAAGTTCTCCGGTCTGGG        |
| 19p13.3               | <i>CLPP</i>                                        | ACTTTTAATTTGCAGGGGTGCC<br>GTGCAGAAGGGAGGGTGTC       |

**Table S3. Infertility-associated genes (reported recently in independent studies)**

|                |                                                                                      |
|----------------|--------------------------------------------------------------------------------------|
| <i>ADAD2</i>   | Krausz <i>et al.</i> , 2020 <sup>3</sup>                                             |
| <i>GCNA</i>    | Hardy <i>et al.</i> , 2021 <sup>4</sup>                                              |
| <i>MAJIN</i>   | Salas-Huetos <i>et al.</i> , 2021 <sup>5</sup>                                       |
| <i>M1AP</i>    | Wyrwoll <i>et al.</i> , 2020 <sup>6</sup>                                            |
| <i>MSH4</i>    | Krausz <i>et al.</i> , 2020 <sup>3</sup>                                             |
| <i>MSH5</i>    | Wyrwoll <i>et al.</i> , 2021 <sup>7</sup>                                            |
| <i>RAD21L1</i> | Krausz <i>et al.</i> , 2020 <sup>3</sup>                                             |
| <i>RNF212</i>  | Riera-Escamilla <i>et al.</i> , 2019 <sup>8</sup>                                    |
| <i>SHOC1</i>   | Krausz <i>et al.</i> , 2020 <sup>3</sup>                                             |
| <i>STAG3</i>   | Riera-Escamilla <i>et al.</i> , 2019; van der Bijl <i>et al.</i> 2019 <sup>8,9</sup> |
| <i>SYCP2</i>   | Schilit <i>et al.</i> , 2019 <sup>10</sup>                                           |
| <i>TERB1</i>   | Krausz <i>et al.</i> , 2020; Salas-Huetos <i>et al.</i> , 2021 <sup>3,5</sup>        |
| <i>TERB2</i>   | Salas-Huetos <i>et al.</i> , 2021 <sup>5</sup>                                       |
| <i>TRIM71</i>  | Torres-Fernández <i>et al.</i> , 2021 <sup>11</sup>                                  |

**Table S4: Results of literature search for candidate genes.**

| <b>Gene</b>  | <b>Expression acc. to Gtex<sup>12</sup></b> | <b>Described in context of male infertility</b>                                                                                                                                                                                                                                           | <b>Described in context of female infertility</b>  | <b>Interaction with a protein involved in spermatogenesis acc. to String database<sup>13</sup></b> | <b>Animal model matching human disease</b>                                   |
|--------------|---------------------------------------------|-------------------------------------------------------------------------------------------------------------------------------------------------------------------------------------------------------------------------------------------------------------------------------------------|----------------------------------------------------|----------------------------------------------------------------------------------------------------|------------------------------------------------------------------------------|
| <b>SYCE1</b> | Highest expression in testis                | Pashaei <i>et al.</i> , 2020 <sup>14</sup> , Maor-Sagie <i>et al.</i> , 2015 <sup>15</sup> , Krausz <i>et al.</i> , 2020 <sup>3</sup>                                                                                                                                                     | Hernández-López <i>et al.</i> , 2020 <sup>16</sup> | <i>REC8, SMC1B, SYCP2</i>                                                                          | Bolcun-Filas <i>et al.</i> , 2007&2009 <sup>17,18</sup>                      |
| <b>TEKT5</b> | Only expressed in testis                    | No                                                                                                                                                                                                                                                                                        | No                                                 | No                                                                                                 | Cao <i>et al.</i> , 2011 <sup>19</sup> , Aoki and Matsui, 2019 <sup>20</sup> |
| <b>MLH3</b>  | High expression in any tissue               | Xu <i>et al.</i> , 2010 <sup>21</sup> , Markandona <i>et al.</i> , 2015 <sup>22</sup> , Zhang <i>et al.</i> , 2015, Chen <i>et al.</i> , 2020 <sup>23</sup> , Zhao <i>et al.</i> , 2019 <sup>25</sup> , Ji <i>et al.</i> , 2012 <sup>26</sup> , Ferrás <i>et al.</i> , 2007 <sup>27</sup> | Pashaiefar <i>et al.</i> , 2013 <sup>28</sup>      | <i>MLH1, MSH4, BRCA2</i>                                                                           | Lipkin <i>et al.</i> , 2002 <sup>29</sup>                                    |
| <b>SLX4</b>  | Highest expression in testis and brain      | No                                                                                                                                                                                                                                                                                        | No                                                 | <i>FANCM</i>                                                                                       | Holloway <i>et al.</i> , 2011 <sup>30</sup>                                  |
| <b>CLPP</b>  | High expression in any tissue               | Demain <i>et al.</i> , 2017 <sup>31</sup>                                                                                                                                                                                                                                                 | Tiosano <i>et al.</i> , 2019 <sup>32</sup>         | No                                                                                                 | Gispert <i>et al.</i> , 2013 <sup>33</sup>                                   |

**Table S5. Genetic and clinical data of azoospermic individuals carrying deletions in the prioritized genes.**

| Individual | Age, origin   | Gene symbols; prioritized genes in bold      | Fertility parameters                                         | Gonadal phenotype, TESE outcome       |
|------------|---------------|----------------------------------------------|--------------------------------------------------------------|---------------------------------------|
| M1369      | 30 y, Syria   | <b>SYCE1</b> , <i>CYP2E1</i> , <i>SCART1</i> | FSH: 4.2<br>LH: 5.3<br>T: 11.5<br>TV: 17/21<br>Azoospermia   | Meiotic arrest,<br>No sperm retrieved |
| M3187      | 32 y, Yemen   | <b>SYCE1</b> , <i>CYP2E1</i> , <i>SCART1</i> | FSH: NA<br>LH: NA<br>T: NA<br>TV: 12/12<br>Azoospermia       | Meiotic arrest,<br>No sperm retrieved |
| M2681      | 37 y, Germany | <b>SYCE1</b> , <i>CYP2E1</i> , <i>SCART1</i> | FSH: NA<br>LH: NA<br>T: NA<br>TV: NA<br>Azoospermia          | SCO,<br>No sperm retrieved            |
| M663       | 33 y, Germany | <b>SYCE1</b> , <i>CYP2E1</i> , <i>SCART1</i> | FSH: 21.1<br>LH: 10.4<br>T: 13.8<br>TV: 13/10<br>Azoospermia | SCO,<br>No sperm retrieved            |
| M921       | 41 y, Iraq    | <b>SYCE1</b> , <i>CYP2E1</i> , <i>SCART1</i> | FSH: 9.8<br>LH: 12.5<br>T: 9.0<br>TV: 3/3<br>Azoospermia     | Meiotic Arrest,<br>No sperm retrieved |
| M226       | 36 y, Syria   | <b>MLH3</b> , <i>EIF2B2</i>                  | FSH: 28.4<br>LH: 7.5<br>T: 12.7<br>TV: 6/7<br>Azoospermia    | SCO,<br>No sperm retrieved            |
| M1635      | 27 y, Germany | <b>SLX4</b> , <i>CLUAP1</i> , <i>NLRC3</i>   | FSH: 19.0<br>LH: 6.2<br>T: 16.3<br>TV: 11/10<br>Azoospermia  | SCO,<br>No sperm retrieved            |
| M877       | 31 y, Poland  | <b>TEKT5</b>                                 | FSH: 21.2<br>LH: 8.1<br>T: 23.2<br>TV: 17/20<br>Azoospermia  | SCO,<br>No sperm retrieved            |



|       |                 |             |                                                           |                               |
|-------|-----------------|-------------|-----------------------------------------------------------|-------------------------------|
| M1281 | 31 y,<br>Cosovo | <b>CLPP</b> | FSH: 23.8<br>LH: 19.0<br>T: 6.3<br>TV: 2/2<br>Azoospermia | SCO,<br>No sperm<br>retrieved |
|-------|-----------------|-------------|-----------------------------------------------------------|-------------------------------|

Abbreviations: FSH: follicle stimulating hormone (IU/L), LH: luteinizing hormone (IU/L), T: testosterone (nmol/L), TV: testicular volume right/left (mL), y: years, SCO: Sertoli cell-only phenotype, NA: not available. Reference values: FSH 1-7 IU/L, LH 2-10 IU/L, T >12 nmol/L, TV >12 mL per testis.

**Table S6. Deletions detected in individuals M921, M1369, M663, M226, M1635, M877, M1281, M2681 and M3187 based on the exome sequencing data.**

| <b>Individual</b> | <b>Chromosome</b> | <b>CNV Start</b> | <b>CNV End</b> | <b>CNV Type</b> | <b>Gene Name</b> | <b>Transcript</b> | <b>Zygoty</b> |
|-------------------|-------------------|------------------|----------------|-----------------|------------------|-------------------|---------------|
| M921              | 10                | 135267485        | 135381888      | DEL             | <i>SYCE1</i>     | NM_001143764      | heterozygous  |
| M3187             | 10                | 135267252        | 135379283      | DEL             | <i>SYCE1</i>     | NM_001143764      | homozygous    |
| M2681             | 10                | 135267252        | 135379283      | DEL             | <i>SYCE1</i>     | NM_001143764      | heterozygous  |
| M1369             | 10                | 135267485        | 135381888      | DEL             | <i>SYCE1</i>     | NM_001143764      | homozygous    |
| M663              | 10                | 135340900        | 135379033      | DEL             | <i>SYCE1</i>     | NM_001143764      | heterozygous  |
| M226              | 14                | 75469978         | 75489721       | DEL             | <i>MLH3</i>      | NM_001040108      | heterozygous  |
| M1635             | 16                | 3586122          | 3658965        | DEL             | <i>SLX4</i>      | NM_032444         | heterozygous  |
| M877              | 16                | 10721440         | 10788730       | DEL             | <i>TEKT5</i>     | NM_144674         | heterozygous  |
| M1281             | 19                | 6333470          | 6374387        | DEL             | <i>CLPP</i>      | NM_006012         | heterozygous  |

**Table S7. Genetic and clinical data of infertile men carrying two single nucleotide variants in the genes *TEKT5* and *SLX4*.**

| Individual | Age, origin    | Genotype                                                                | Fertility parameters                                       | Gonadal phenotype, TESE outcome               |
|------------|----------------|-------------------------------------------------------------------------|------------------------------------------------------------|-----------------------------------------------|
| M1767      | 38 y, Iraq     | <i>TEKT5</i> :<br>c.[263G>A(;);1022C>T]<br>p.(Arg88His)(;)(Ala341Val)   | FSH: 36.5<br>LH: 5.6<br>T: 9.6<br>TV: 6/5<br>Azoospermia   | Round spermatid arrest,<br>No sperm retrieved |
| PIT10      | 21 y, European | <i>TEKT5</i> :<br>c.[531G>C(;);938C>G]<br>p.(Glu177Asp)(;)(Ser313Cys)   | FSH: NA<br>LH: NA<br>T: NA<br>TV: NA<br>Azoospermia        | Early meiotic arrest,<br>No sperm retrieved   |
| M1626      | 25 y, Serbia   | <i>SLX4</i> :<br>c.[2359G>A(;);5468G>A]<br>p.(Glu787Lys)(;)(Arg1823Gln) | FSH: 2.2<br>LH: 2.7<br>T: 18.7<br>TV: 28/25<br>Azoospermia | NA                                            |
| M2023      | 32 y, Syria    | <i>SLX4</i> :<br>c.[2359G>A];[2359G>A]<br>p.[Glu787Lys];[Glu787Lys]     | FSH: 10.9<br>LH: 6.2<br>T: 12.2<br>TV: 10/7<br>Azoospermia | NA                                            |

Abbreviations: FSH: follicle stimulating hormone (IU/L), LH: luteinizing hormone (IU/L), NA: not available/applicable, T: testosterone (nmol/L), TV: testicular volume right/left (mL), y: years, TESE: testicular sperm extraction, SCO: Sertoli cell-only phenotype.

Reference values: FSH 1-7 IU/L, LH 2-10 IU/L, T >12 nmol/L, TV >12 mL per testis.

**Table S8: ACMG-AMP criteria for *TEKT5* and *SLX4* variants (excel file).**

**Figure S1: SNP-array results demonstrating deletions affecting SYCE1.**

M2681 is affected by a heterozygous deletion (A) as well as a missense variant in SYCE1 on the second allele. M3187 is affected by a homozygous deletion covering SYCE1 (B).

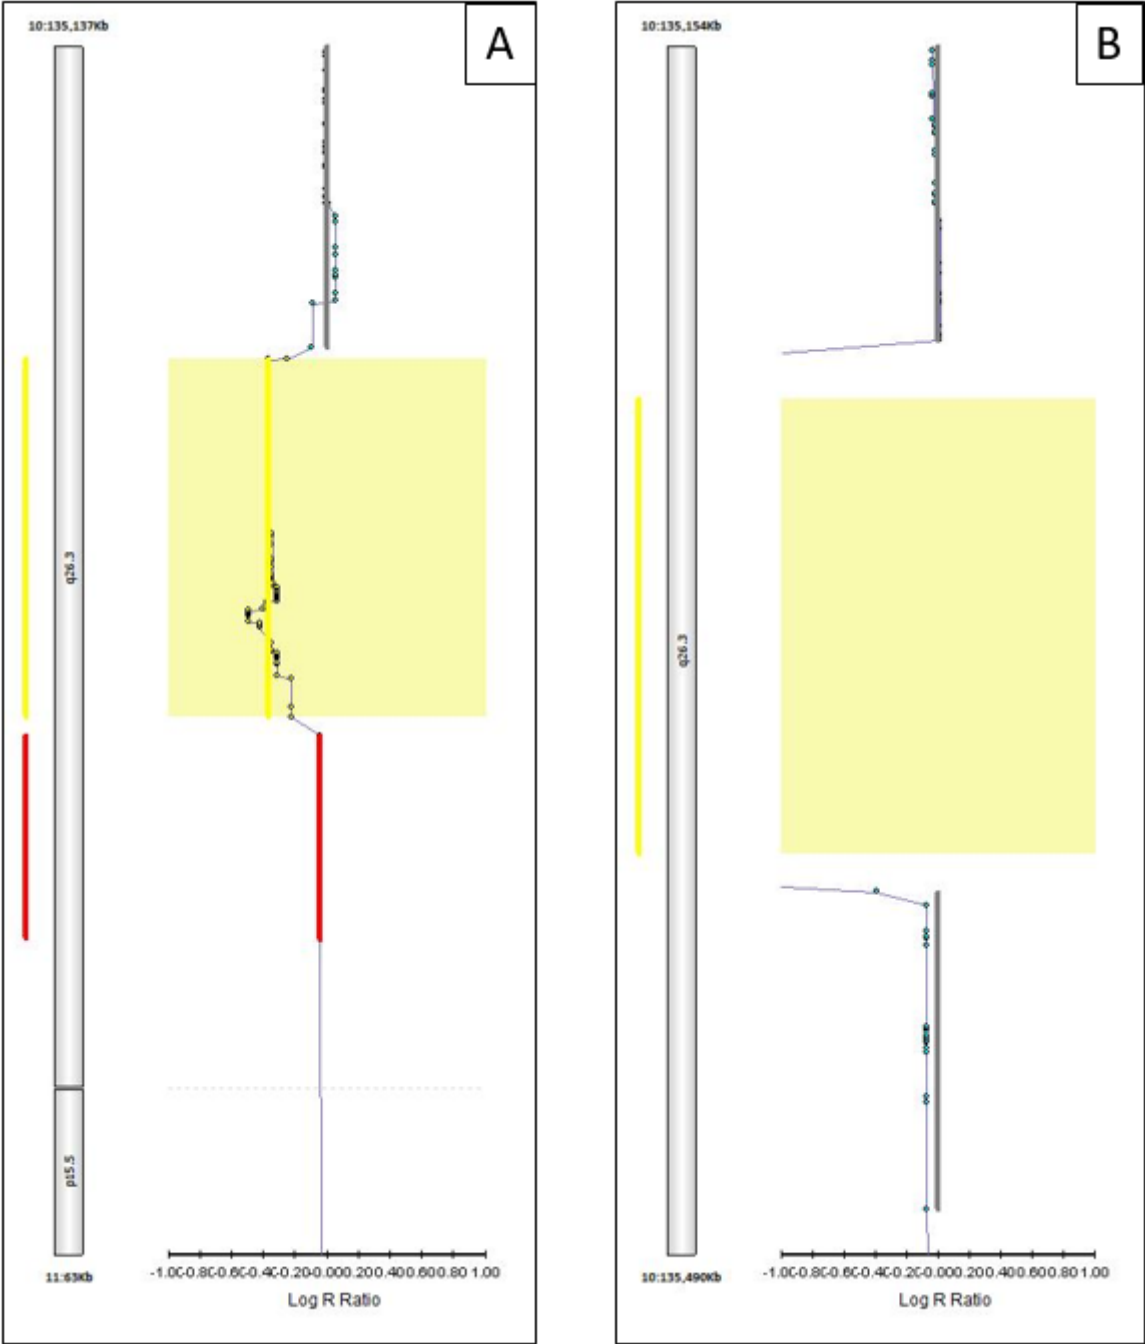

**Figure S2: Electropherograms of the *TEKT5* variants in M1767 and his mother.**

M1767 was identified with two heterozygous *TEKT5* variants: c.263G>A and c.1022C>T. The mother carries only the variant c.263G>A while the other variant was not present, suggesting compound-heterozygosity of both variants in M1767. DNA from the father of M1767 was not available.

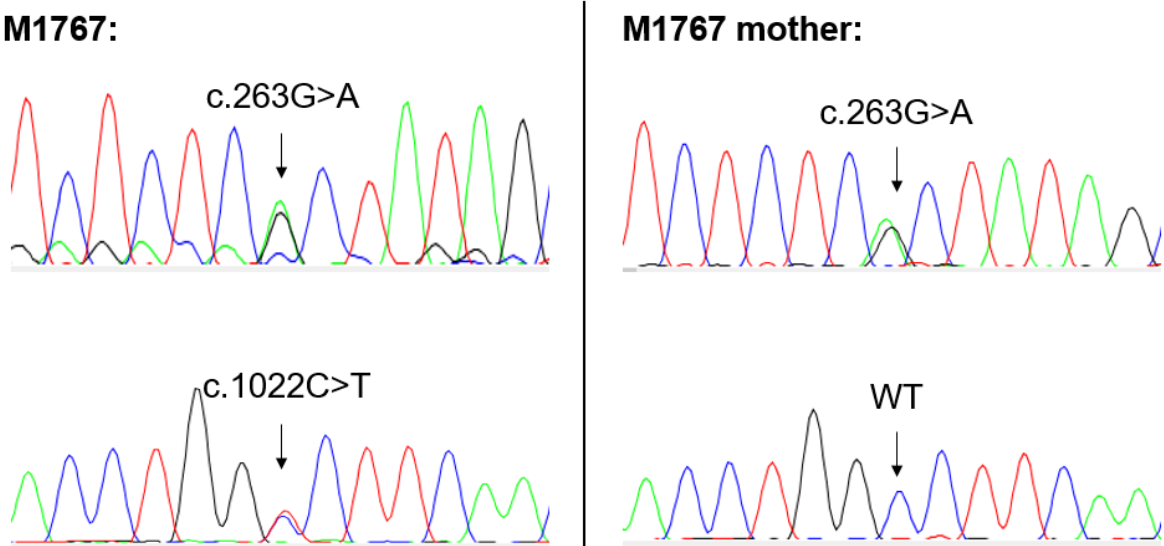

**Figure S3: Prevalence of all CNVs, deletions and duplications.**

The prevalence of all CNVs as well as deletions and duplications detected in 21 men from the control group was compared to the prevalence of those detected in 37 men with MeiA and 194 men with SCOS. There were significantly more CNVs detected in the control group compared to men with MeiA. All other statistical tests did not reveal significant differences.

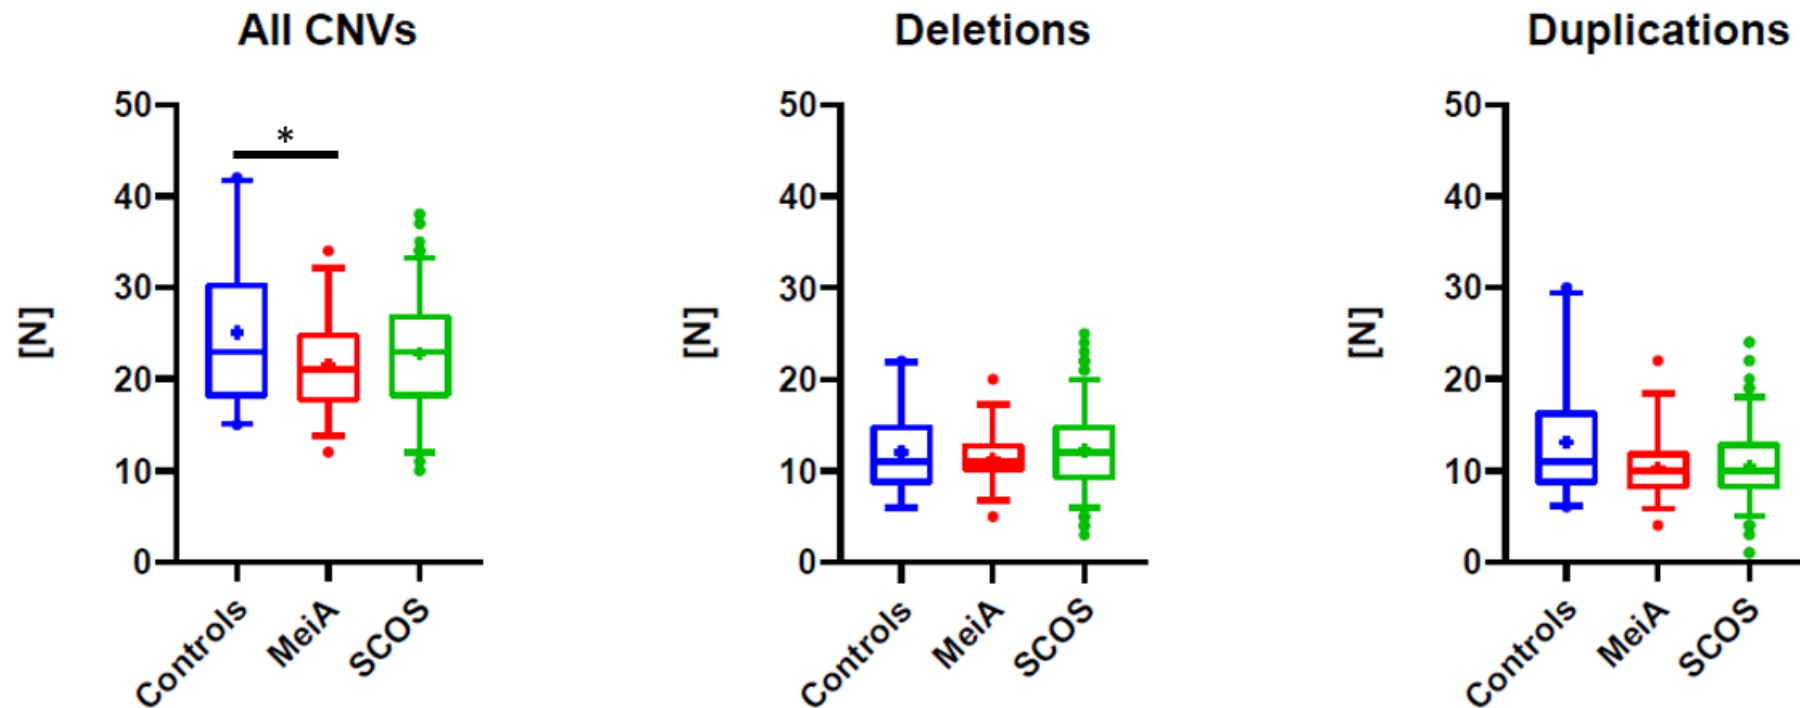

**Figure S4: Chromosomal distribution of deletions and duplications.**

The distribution of duplications and deletions was calculated per chromosome and normalized to 100 men for control men, men with MeiA and men with SCO. Positive values indicate duplications, while negative values indicate deletions.

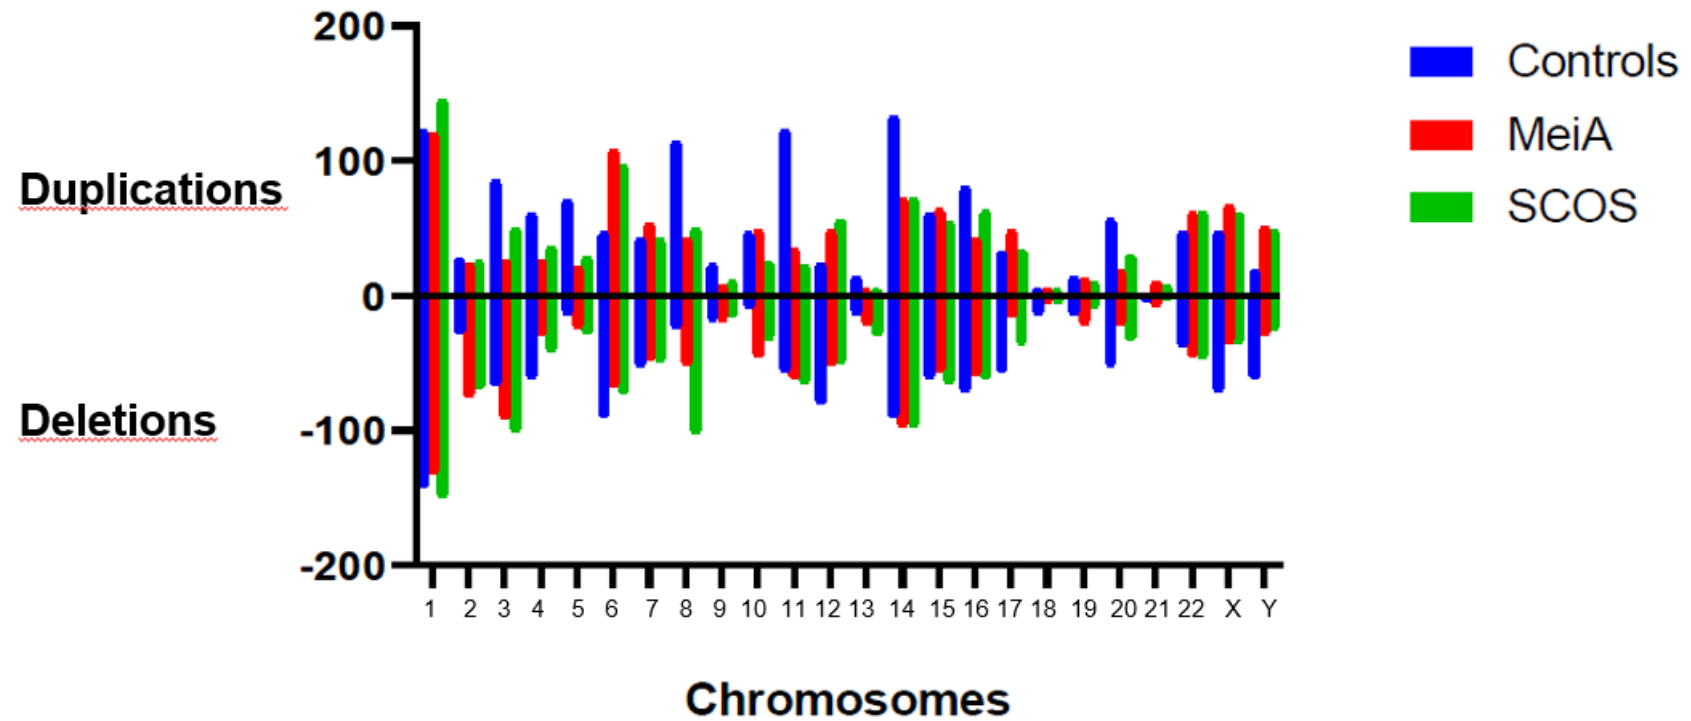

**Figure S5: Size in kilo base pairs of CNVs, deletions and duplications.**

The size of all CNVs as well as deletions and duplications detected in 21 men from the control group was compared to the size of those detected in 37 men with MeiA and 194 men with SCO. There were no significant differences regarding the size of all CNVs, deletions or duplications between control men, men with MeiA and men with SCO.

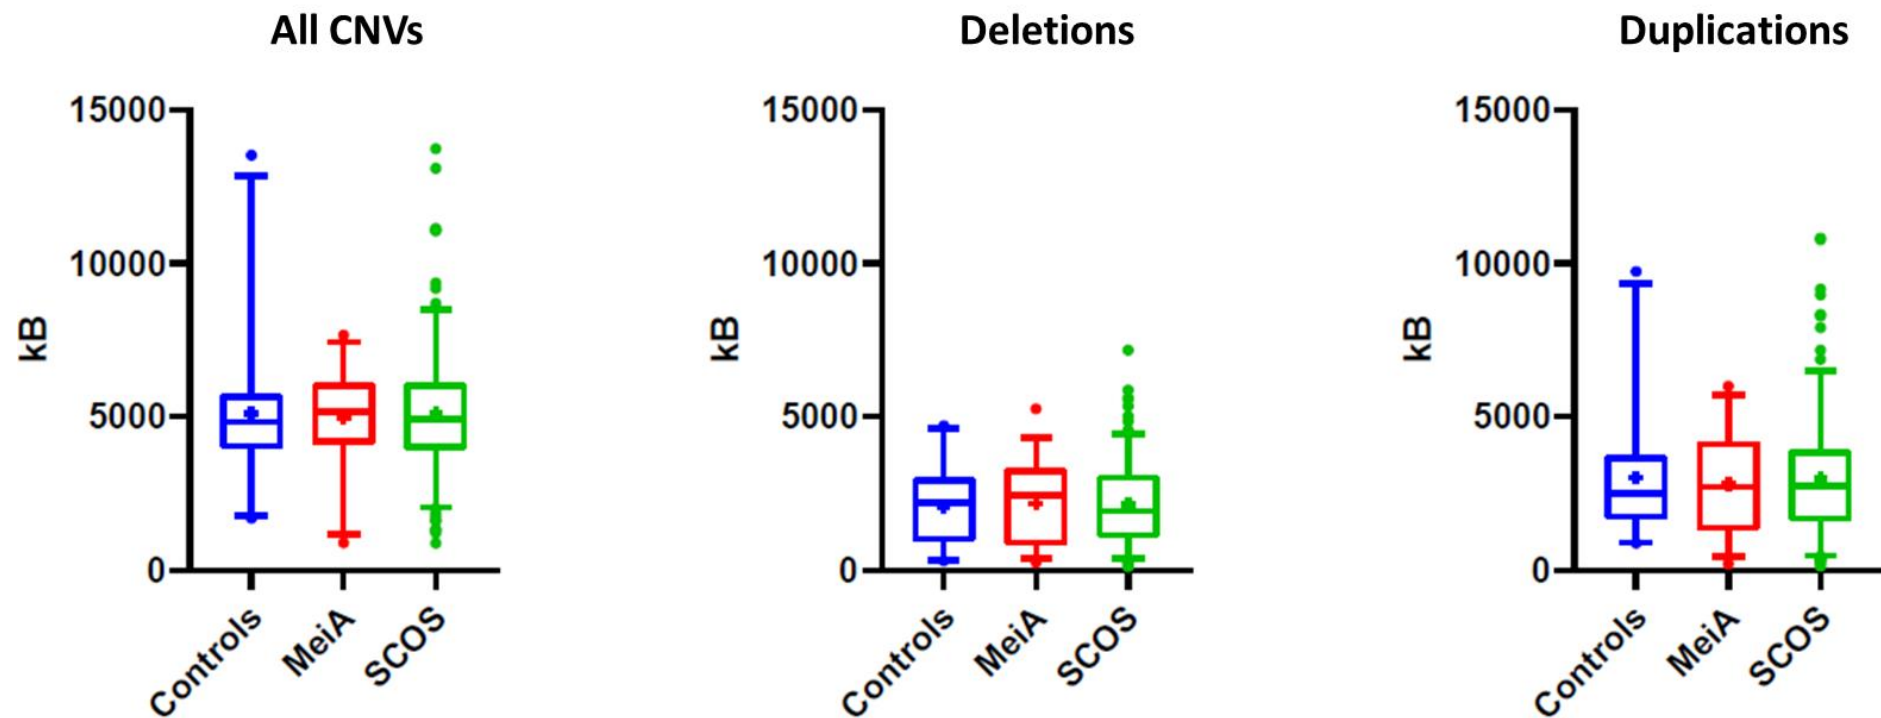



**References**

- 1 Tüttelmann F, Simoni M, Kliesch S et al. Copy number variants in patients with severe oligozoospermia and sertoli-cell-only syndrome. *PLoS One* 2011;6:e19426.
- 2 Houston BJ, Riera-Escamilla A, Wyrwoll MJ et al. A systematic review of the validated monogenic causes of human male infertility: 2020 update and a discussion of emerging gene-disease relationships. *Hum Reprod Updat* 2021 [Online ahead of print].
- 3 Krausz C, Riera-Escamilla A, Moreno-Mendoza D et al. Genetic dissection of spermatogenic arrest through exome analysis: clinical implications for the management of azoospermic men. *Genet Med* 2020;22:1956-1966.
- 4 Hardy JJ, Wyrwoll MJ, Mcfadden W et al. Variants in GCNA, X-linked germ-cell genome integrity gene, identified in men with primary spermatogenic failure. *Hum Genet* 2021;140:1169-1182.
- 5 Salas-Huetos A, Tüttelmann F, Wyrwoll MJ et al. Disruption of human meiotic telomere complex genes TERB1, TERB2 and MAJIN in men with non-obstructive azoospermia. *Hum Genet* 2020;140:217-227.
- 6 Wyrwoll MJ, Temel ŞG, Nagirnaja L et al. Bi-allelic Mutations in M1AP Are a Frequent Cause of Meiotic Arrest and Severely Impaired Spermatogenesis Leading to Male Infertility. *Am J Hum Genet* 2020;107:342-351.
- 7 Wyrwoll MJ, van Walree ES, Hamer G et al. Bi-allelic variants in DNA mismatch repair proteins MutS Homolog MSH4 and MSH5 cause infertility in both sexes. *Hum Reprod* 2021 [Online ahead of print].
- 8 Riera-Escamilla A, Enguita-Marruedo A, Moreno-Mendoza D et al. Sequencing of a 'mouse azoospermia' gene panel in azoospermic men: identification of RNF212 and STAG3 mutations as novel genetic causes of meiotic arrest. *Hum Reprod* 2019;34:978–988.
- 9 van der Bijl N, Röpke A, Biswas U et al. Mutations in STAG3 cause male infertility due to meiotic arrest. *Hum Reprod* 2019;34:2112-2119.
- 10 Schilit SLP, Menon S, Friedrich C et al. SYCP2 Translocation-Mediated Dysregulation and Frameshift Variants Cause Human Male Infertility. *Am J Hum Genet* 2020;106:41–57.
- 11 Torres-Fernández LA, Emich J, Port Y et al. TRIM71 Deficiency Causes Germ Cell Loss During Mouse Embryogenesis and Is Associated With Human Male Infertility. *Front cell Dev Biol* 2021;9:658966.
- 12 Lonsdale J, Thomas J, Salvatore M et al. The Genotype-Tissue Expression (GTEx) project. *Nat Genet* 2013;45:580.
- 13 Szklarczyk D, Franceschini A, Wyder S et al. STRING v10: protein–protein interaction networks, integrated over the tree of life. *Nucleic Acids Res* 2015;43:D447–D452.
- 14 Pashaei M, Rahimi Bidgoli MM, Zare-Abdollahi D et al. The second mutation of SYCE1 gene associated with autosomal recessive nonobstructive azoospermia. *J Assist Reprod Genet* 2020;37:451–458.
- 15 Maor-Sagie E, Cinnamon Y, Yaacov B et al. Deleterious mutation in SYCE1 is associated with non-obstructive azoospermia. *J Assist Reprod Genet* 2015;32:887-891.
- 16 Hernández-López D, Geisinger A, Trovero MF et al. Familial primary ovarian insufficiency associated with a SYCE1 point mutation: Defective meiosis elucidated in humanized mice. *Mol Hum Reprod* 2020;26(7):485-497.
- 17 Bolcun-Filas E, Speed R, Taggart M et al. Mutation of the mouse Syce1 gene disrupts synapsis and suggests a link between synaptonemal complex structural components and DNA repair. *PLoS Genet* 2009;5:e1000393.
- 18 Bolcun-Filas E, Costa Y, Speed R et al. SYCE2 is required for synaptonemal complex assembly, double strand break repair, and homologous recombination. *J Cell Biol* 2007;176:741–747.

- 19 Cao W, Ijiri TW, Huang AP, Gerton GL. Characterization of a novel tektin member, TEKT5, in mouse sperm. *J Androl* 2011;32:55-69.
- 20 Aoki N, Matsui Y. Comprehensive Analysis of Mouse Cancer/Testis Antigen Functions in Cancer Cells and Roles of TEKT5 in Cancer Cells and Testicular Germ Cells. *Mol Cell Biol* 2019;39:1–17.
- 21 Xu K, Lu T, Zhou H, Bai L, Xiang Y. The role of MSH5 C85T and MLH3 C2531T polymorphisms in the risk of male infertility with azoospermia or severe oligozoospermia. *Clin Chim Acta* 2010;411 49–52.
- 22 Markandona O, Dafopoulos K, Anifandis G et al. Single-nucleotide polymorphism rs 175080 in the MLH3 gene and its relation to male infertility. *J Assist Reprod Genet* 2015;32:1795-9.
- 23 Zhang X, Ding M, Ding X, Li T, Chen H. Six polymorphisms in genes involved in DNA double-strand break repair and chromosome synapsis: association with male infertility. *Syst Biol Reprod Med* 2015;61:1939–6368.
- 24 Chen S, Wang G, Zheng X et al. Whole-exome sequencing of a large Chinese azoospermia and severe oligospermia cohort identifies novel infertility causative variants and genes. *Hum Mol Genet* 2020;29:2451-2459.
- 25 Zhao X, Mu C, Ma J, Dai X, Jiao H. The association of four SNPs in DNA mismatch repair genes with idiopathic male infertility in northwest China. *Int J Immunogenet* 2019;46:451–458.
- 26 Ji G, Long Y, Zhou Y, Huang C, Gu A, Wang X. Common variants in mismatch repair genes associated with increased risk of sperm DNA damage and male infertility. *BMC Med* 2012;10:49.
- 27 Ferrás C, Zhou X, Sousa M, Lindblom A, Barros A. DNA mismatch repair gene hMLH3 variants in meiotic arrest. *Fertil Steril* 2007;88:1681–1684.
- 28 Pashaiefar H, Sheikha MH, Kalantar SM, Jahaninejad T, Zaimy MA, Ghasemi N. Analysis of MLH3 C2531T polymorphism in Iranian women with unexplained infertility. *Iran J Reprod Med* 2013;11:19-24.
- 29 Lipkin SM, Moens PB, Wang V et al. Meiotic arrest and aneuploidy in MLH3-deficient mice. *Nat Genet* 2002;31:385-90.
- 30 Holloway JK, Mohan S, Balmus G et al. Mammalian BTBD12 (SLX4) protects against genomic instability during mammalian spermatogenesis. *PLoS Genet* 2011;7:e1002094.
- 31 Demain LAM, Urquhart JE, O’Sullivan J et al. Expanding the genotypic spectrum of Perrault syndrome. *Clin Genet* 2017;91:302–312.
- 32 Tiosano D, Mears JA, Buchner DA. Mitochondrial Dysfunction in Primary Ovarian Insufficiency. *Endocrinology* 2019;160:2353–2366.
- 33 Gispert S, Parganlija D, Klinkenberg M et al. Loss of mitochondrial peptidase clpp leads to infertility, hearing loss plus growth retardation via accumulation of CLPX, mtDNA and inflammatory factors. *Hum Mol Genet* 2013;22:4871–4887.
